# Supplementary material for: Nivolumab for Patients With High-Risk Oral Leukoplakia: A Nonrandomized Controlled Trial
Source: PubMed Central journal article supplement — JAMA Oncol. 2023 Nov 16;10(1):32–41. doi: 10.1001/jamaoncol.2023.4853 (PMC10654930; doi:10.1001/jamaoncol.2023.4853), 2023-11-16
Supplement: jamaoncol-e234853-s003.pdf [file jamaoncol-e234853-s003.pdf]

## Data Sharing Statement

Hanna. Nivolumab for Patients With High-Risk Oral Leukoplakia. *JAMA Oncol*. Published November 16, 2023. doi:10.1001/jamaoncol.2023.4853

### Data

**Data available:** Yes

**Data types:** Deidentified participant data

**How to access data:** De-identified data and intraoral photographs are available upon request.

**When available:** With publication

### Supporting Documents

**Document types:** None

### Additional Information

**Who can access the data:** Researchers whose proposed use of the data has been approved.

**Types of analyses:** Specified purposes.

**Mechanisms of data availability:** After approval of a proposal.

**Any additional restrictions:** N/A
